# Supplementary material for: Fractionated radiation suppresses Kruppel-like factor 2 pathway to a greater extent than by single exposure to the same total dose
Source: PubMed Central journal article supplement (PMC7206069; doi:10.1038/s41598-020-64672-3), 2020-05-07
Supplement: 41598_2020_64672_MOESM1_ESM.pdf [file 41598_2020_64672_MOESM1_ESM.pdf]

**Title: Fractionated radiation suppresses Kruppel-like factor 2 pathway to a greater extent than by single exposure to the same total dose**

Ratan Sadhukhan<sup>1</sup>, Justin W. C. Leung<sup>2</sup>, Sarthak Garg<sup>1</sup>, Kimberly J. Krager<sup>1</sup>, Alena V. Savenka<sup>3</sup>, Alexei G. Basnakian<sup>3,4</sup>, Rupak Pathak<sup>1\*</sup>

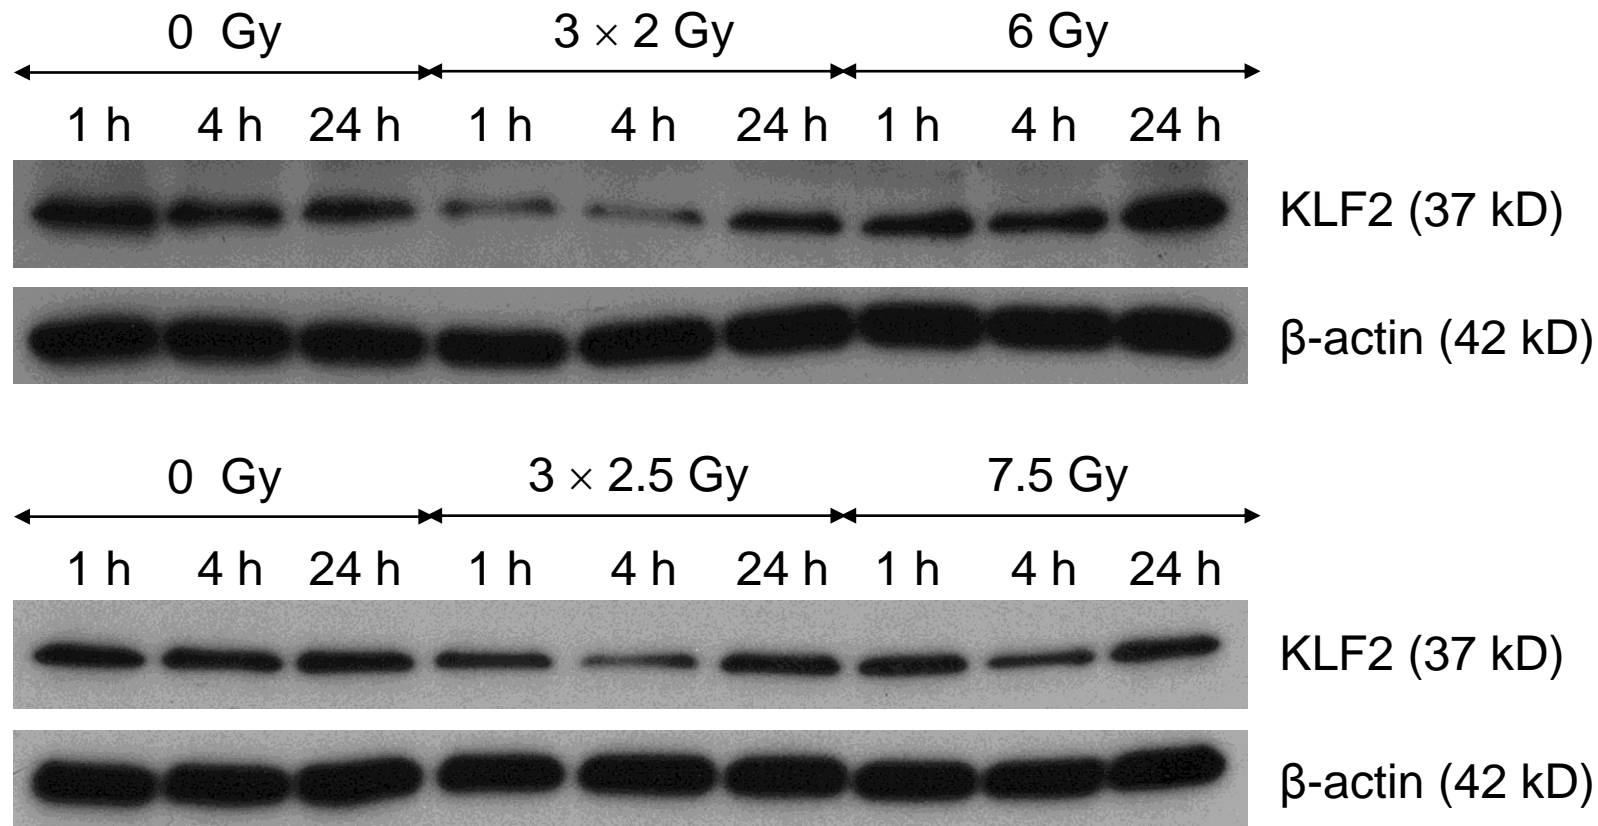

**Suppl. Fig. 1: Fractionated radiation has more profound effect in suppressing KLF2 compared to single exposure.** Representative Western blot analysis of KLF2 levels in un-irradiated (0 Gy) and irradiated HUVECs after 1 h, 4 h, and 24 h of exposure to 3 fractions of either 2 Gy or 2.5 Gy and a single exposure to either 6 Gy or 7.5 Gy, at 24 h inter-fraction intervals in whole-cell lysates from 2 independent experiments.  $\beta$ -actin serves as a loading control.

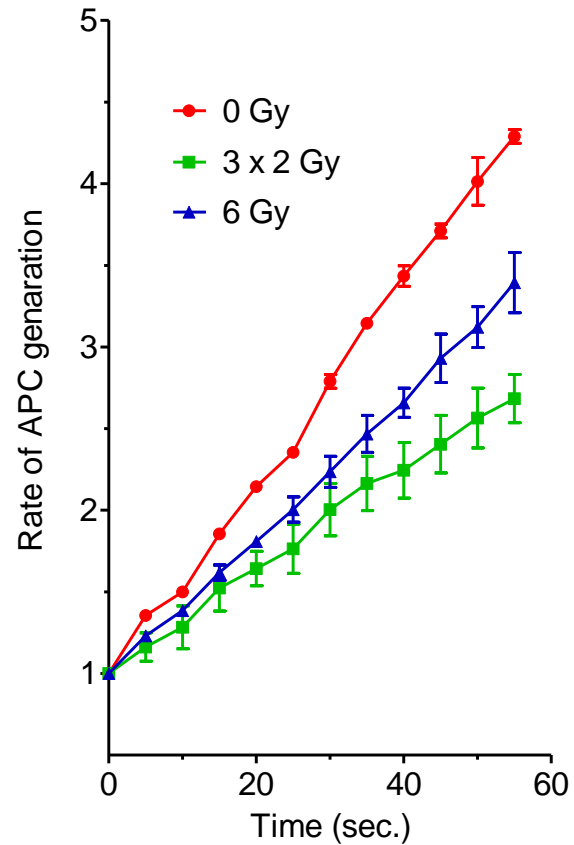

**Suppl. Fig. 2: Fractionated radiation has more profound effect in suppressing APC generation compared to single exposure.** APC generation in HUVECs after 24 h of exposure to 0 Gy (sham), 3 fractions of 2 Gy, and single exposure to 6 Gy. Experiments were performed twice (n = 2) with four biological replicates. “n” representing number of independent experiments performed.

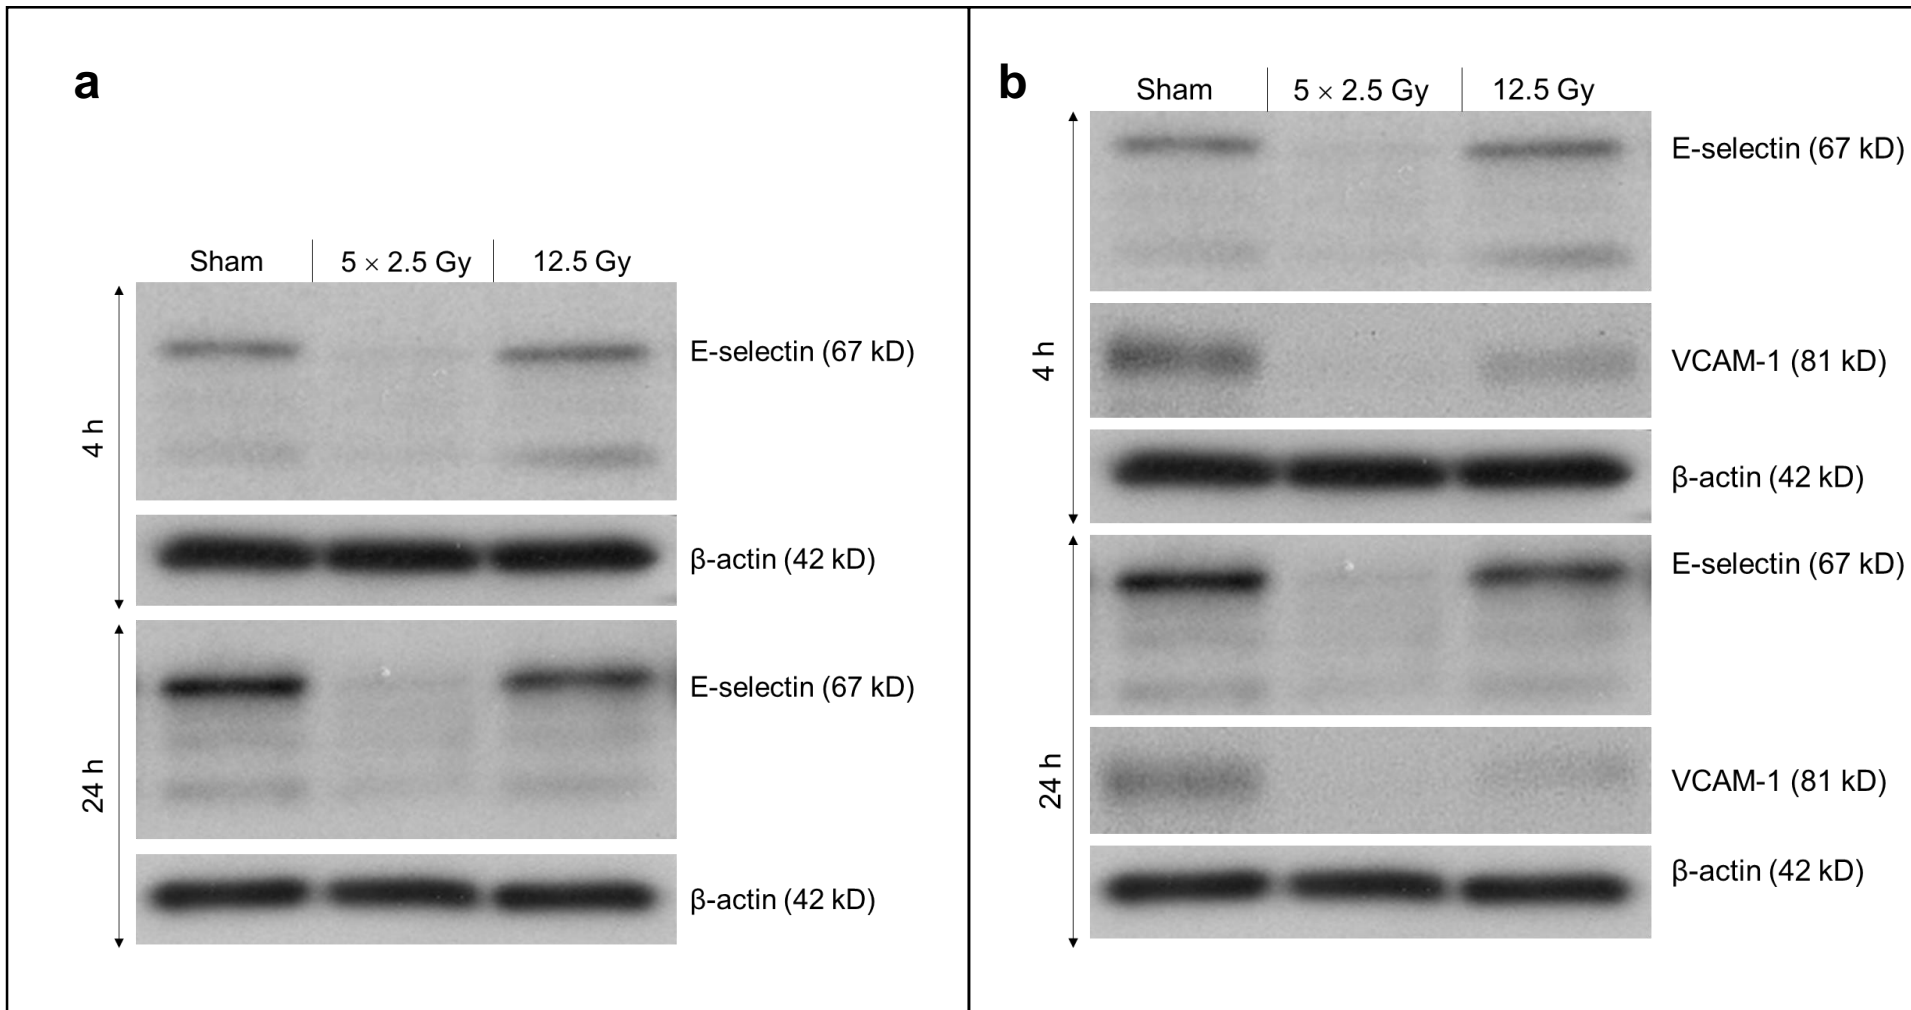

**Suppl. Fig. 3: Fractionated radiation has more profound effect in suppressing E-selectin and VCAM-1 compared to single exposure.** (a) Representative Western blot analysis of E-selectin levels in un-irradiated (0 Gy) and irradiated HUVECs after 4 h, and 24 h of exposure to 5 fractions of either 2 Gy and a single exposure to 10 Gy, at 24 h inter-fraction intervals in whole-cell lysates from 3 independent experiments. (b) Representative Western blot analysis of E-selectin and VCAM-1 levels in un-irradiated (0 Gy) and irradiated HUVECs after 4 h, and 24 h of exposure to 5 fractions of either 2.5 Gy and a single exposure to 12.5 Gy, at 24 h inter-fraction intervals in whole-cell lysates from 3 independent experiments β-actin serves as a loading control.
